# Supplementary material
Source: publisher figshare collection journal article supplement (https://aacr.figshare.com/articles/dataset/_/22415717)
Supplement: Supplementary file 1 [file 39861770]

| Target Class      | Assay Name                | Assay Target  | Mode       | % Response Replicate 1 | % Response Replicate 2 | % Response Average |
|-------------------|---------------------------|---------------|------------|------------------------|------------------------|--------------------|
| GPCR              | Calcium Flux              | ADORA2A       | Agonist    | -10.3                  | -4.2                   | -7.3               |
| GPCR              | Calcium Flux              | ADORA2A       | Antagonist | -4.8                   | -34.5                  | -19.7              |
| GPCR              | Calcium Flux              | ADRA1A        | Agonist    | -0.4                   | -1.1                   | -0.7               |
| GPCR              | Calcium Flux              | ADRA1A        | Antagonist | 3.6                    | -2.7                   | 0.5                |
| GPCR              | cAMP                      | ADRA2A        | Agonist    | 11.8                   | 4.5                    | 8.2                |
| GPCR              | cAMP                      | ADRA2A        | Antagonist | -0.5                   | 4.5                    | 2.0                |
| GPCR              | cAMP                      | ADRB1         | Agonist    | -0.1                   | -0.7                   | -0.4               |
| GPCR              | cAMP                      | ADRB1         | Antagonist | -42.0                  | -32.6                  | -37.3              |
| GPCR              | cAMP                      | ADRB2         | Agonist    | -0.7                   | 2.0                    | 0.7                |
| GPCR              | cAMP                      | ADRB2         | Antagonist | -13.6                  | 14.3                   | 0.4                |
| GPCR              | Calcium Flux              | AVPR1A        | Agonist    | -2.2                   | -2.7                   | -2.5               |
| GPCR              | Calcium Flux              | AVPR1A        | Antagonist | 18.9                   | 8.2                    | 13.6               |
| GPCR              | Calcium Flux              | CCKAR         | Agonist    | 0.1                    | 0.3                    | 0.2                |
| GPCR              | Calcium Flux              | CCKAR         | Antagonist | 6.3                    | 4.8                    | 5.6                |
| GPCR              | Calcium Flux              | CHRM1         | Agonist    | -2.7                   | -0.9                   | -1.8               |
| GPCR              | Calcium Flux              | CHRM1         | Antagonist | 29.9                   | 20.1                   | 25.0               |
| GPCR              | cAMP                      | CHRM2         | Agonist    | 23.9                   | 6.3                    | 15.1               |
| GPCR              | cAMP                      | CHRM2         | Antagonist | -21.1                  | -17.6                  | -19.4              |
| GPCR              | Calcium Flux              | CHRM3         | Agonist    | -2.7                   | -1.0                   | -1.9               |
| GPCR              | Calcium Flux              | CHRM3         | Antagonist | 4.2                    | 8.6                    | 6.4                |
| GPCR              | cAMP                      | CNR1          | Agonist    | 5.0                    | 8.1                    | 6.6                |
| GPCR              | cAMP                      | CNR1          | Antagonist | 13.0                   | 15.4                   | 14.2               |
| GPCR              | cAMP                      | CNR2          | Agonist    | -40.7                  | -68.7                  | -54.7              |
| GPCR              | cAMP                      | CNR2          | Antagonist | -1.1                   | -2.7                   | -1.9               |
| GPCR              | cAMP                      | DRD1          | Agonist    | 1.2                    | 0.2                    | 0.7                |
| GPCR              | cAMP                      | DRD1          | Antagonist | -14.2                  | -6.9                   | -10.6              |
| GPCR              | cAMP                      | DRD2S         | Agonist    | 4.1                    | 20.5                   | 12.3               |
| GPCR              | cAMP                      | DRD2S         | Antagonist | -0.4                   | 0.4                    | 0.0                |
| GPCR              | Calcium Flux              | EDNRA         | Agonist    | 2.2                    | -0.5                   | 0.8                |
| GPCR              | Calcium Flux              | EDNRA         | Antagonist | 8.2                    | 1.2                    | 4.7                |
| GPCR              | Calcium Flux              | HRH1          | Agonist    | 1.5                    | 1.7                    | 1.6                |
| GPCR              | Calcium Flux              | HRH1          | Antagonist | 36.0                   | 27.8                   | 31.9               |
| GPCR              | cAMP                      | HRH2          | Agonist    | 0.6                    | 0.1                    | 0.4                |
| GPCR              | cAMP                      | HRH2          | Antagonist | 6.4                    | 16.0                   | 11.2               |
| GPCR              | cAMP                      | HTR1A         | Agonist    | 9.1                    | -9.8                   | -0.4               |
| GPCR              | cAMP                      | HTR1A         | Antagonist | 2.6                    | 11.9                   | 7.3                |
| GPCR              | cAMP                      | HTR1B         | Agonist    | 5.5                    | 1.5                    | 3.5                |
| GPCR              | cAMP                      | HTR1B         | Antagonist | -3.3                   | -2.5                   | -2.9               |
| GPCR              | Calcium Flux              | HTR2A         | Agonist    | -3.1                   | -2.7                   | -2.9               |
| GPCR              | Calcium Flux              | HTR2A         | Antagonist | 31.5                   | 22.6                   | 27.1               |
| GPCR              | Calcium Flux              | HTR2B         | Agonist    | 0.7                    | 1.4                    | 1.1                |
| GPCR              | Calcium Flux              | HTR2B         | Antagonist | 53.6                   | 50.3                   | 52.0               |
| GPCR              | cAMP                      | OPRD1         | Agonist    | 6.2                    | 6.8                    | 6.5                |
| GPCR              | cAMP                      | OPRD1         | Antagonist | 10.5                   | 10.7                   | 10.6               |
| GPCR              | cAMP                      | OPRK1         | Agonist    | 60.8                   | 53.6                   | 57.2               |
| GPCR              | cAMP                      | OPRK1         | Antagonist | -2.9                   | -3.1                   | -3.0               |
| GPCR              | cAMP                      | OPRM1         | Agonist    | 2.9                    | -9.3                   | -3.2               |
| GPCR              | cAMP                      | OPRM1         | Antagonist | -3.6                   | -3.6                   | -3.6               |
| NHR               | NHR Nuclear Translocation | AR            | Agonist    | -0.8                   | -0.6                   | -0.7               |
| NHR               | NHR Nuclear Translocation | AR            | Antagonist | -4.3                   | -13.2                  | -8.8               |
| NHR               | NHR Protein Interaction   | GR            | Agonist    | 0.1                    | -0.3                   | -0.1               |
| NHR               | NHR Protein Interaction   | GR            | Antagonist | -84.9                  | -64.9                  | -74.9              |
| Transporter       | Transporter               | DAT           | Blocker    | 66.0                   | 64.6                   | 65.3               |
| Transporter       | Transporter               | NET           | Blocker    | 95.6                   | 77.8                   | 86.7               |
| Transporter       | Transporter               | SERT          | Blocker    | 8.4                    | 7.3                    | 7.9                |
| Ion Channel       | Ion Channel               | CAV1.2        | Blocker    | 4.1                    | 3.3                    | 3.7                |
| Ion Channel       | Ion Channel               | GABAA         | Opener     | -6.1                   | -6.7                   | -6.4               |
| Ion Channel       | Ion Channel               | GABAA         | Blocker    | -7.8                   | 6.9                    | -0.4               |
| Ion Channel       | Ion Channel               | hERG          | Blocker    | 8.8                    | 21.5                   | 15.2               |
| Ion Channel       | Ion Channel               | HTR3A         | Opener     | -1.1                   | -1.6                   | -1.3               |
| Ion Channel       | Ion Channel               | HTR3A         | Blocker    | 5.2                    | 10.9                   | 8.0                |
| Ion Channel       | Ion Channel               | KvLQT1/minK   | Opener     | 4.9                    | -2.0                   | 1.4                |
| Ion Channel       | Ion Channel               | KvLQT1/minK   | Blocker    | 10.5                   | 14.1                   | 12.3               |
| Ion Channel       | Ion Channel               | nAChR(a4/b2)  | Opener     | -10.3                  | -5.9                   | -8.1               |
| Ion Channel       | Ion Channel               | nAChR(a4/b2)  | Blocker    | 24.1                   | 7.2                    | 15.7               |
| Ion Channel       | Ion Channel               | NAV1.5        | Blocker    | 9.2                    | 26.1                   | 17.6               |
| Ion Channel       | Ion Channel               | NMDAR (1A/2B) | Opener     | 0.0                    | -1.3                   | -0.6               |
| Ion Channel       | Ion Channel               | NMDAR (1A/2B) | Blocker    | 14.4                   | 12.6                   | 13.5               |
| Ion-Kinase Enzyme | Enzymatic                 | AChE          | Inhibitor  | 11.6                   | 6.3                    | 9.0                |
| Ion-Kinase Enzyme | Enzymatic                 | COX1          | Inhibitor  | -56.3                  | -68.6                  | -62.4              |
| Ion-Kinase Enzyme | Enzymatic                 | COX2          | Inhibitor  | 36.6                   | 36.1                   | 36.3               |
| Ion-Kinase Enzyme | Enzymatic                 | MAOA          | Inhibitor  | -11.7                  | 4.3                    | -3.7               |
| Ion-Kinase Enzyme | Enzymatic                 | PDE3A         | Inhibitor  | 8.8                    | -7.4                   | 0.7                |
| Ion-Kinase Enzyme | Enzymatic                 | PDE4D2        | Inhibitor  | -0.5                   | -5.4                   | -3.0               |
| Kinases           | Binding                   | INSR          | Inhibitor  | 29.3                   | 22.0                   | 25.7               |
| Kinases           | Binding                   | LCK           | Inhibitor  | 12.2                   | -3.6                   | 4.3                |
| Kinases           | Binding                   | ROCK1         | Inhibitor  | 16.2                   | 4.8                    | 10.5               |
| Kinases           | Binding                   | VEGFR2        | Inhibitor  | 17.6                   | 14.7                   | 16.1               |

**Table S1.** Raw data from pharmacological profile screening for DJ101. Data was generated by DiscoverX via the Safety47™ panel of functional assays with all human targets for safety screening. Response values within ±70% are considered insignificant according to the vendor.

| % Response Legend    |  |
|----------------------|--|
| $x > 95\%$           |  |
| $95\% \leq x < 90\%$ |  |
| $90\% \leq x < 85\%$ |  |
| $85\% \leq x < 70\%$ |  |
| $x < 70\%$           |  |
